# Supplementary material
Source: PubMed Central journal article supplement (PMC3593234)
Supplement: NIHMS433389-supplement-Supplementary_Data.pdf [file NIHMS433389-supplement-Supplementary_Data.pdf]

## SUPPLEMENTAL TABLES

**Supplementary Table 1. Family Sizes**

| <b>Sibship Size</b> | <b># of Sibships</b> | <b># of Siblings</b> |
|---------------------|----------------------|----------------------|
| 1                   | 1701 <sup>a</sup>    | 1701 <sup>a</sup>    |
| 2                   | 317                  | 634                  |
| 3                   | 131                  | 393                  |
| 4                   | 38                   | 152                  |
| 5                   | 7                    | 35                   |
| 6                   | 7                    | 42                   |
| 7                   | 1                    | 7                    |
| Total               | 2202                 | 2964                 |

<sup>a</sup> Included 275 participants from Omni cohort, where pedigree data was not available.

**Supplementary Table 2. Percent Composition of Red Blood Cell Fatty Acids**

| <b>Variable, Mean (SD)</b>                   | <b>All<br/>N=3196</b> | <b>Offspring<br/>N=2899</b> | <b>Omni<br/>N=297</b> | <b>t-test<br/>P-value<sup>a</sup></b> |
|----------------------------------------------|-----------------------|-----------------------------|-----------------------|---------------------------------------|
| Myristic, C14:0                              | 0.31(0.08)            | 0.31 (0.08)                 | 0.32 (0.11)           | <b>0.0017</b>                         |
| Palmitic, C16:0                              | 21.29(1.24)           | 21.28 (1.24)                | 21.45 (1.17)          | 0.026                                 |
| Stearic, C18:0                               | 18.11(0.95)           | 18.10 (0.95)                | 18.19 (0.99)          | 0.15                                  |
| Lignoceric, C24:0                            | 0.43(0.16)            | 0.42 (0.16)                 | 0.49 (0.14)           | <b>&lt;0.0001</b>                     |
| Palmitoleic, C16:1                           | 0.35(0.19)            | 0.36 (0.19)                 | 0.29 (0.17)           | <b>&lt;0.0001</b>                     |
| Oleic, C18:1                                 | 13.88(1.06)           | 13.91 (1.04)                | 13.50 (1.17)          | <b>&lt;0.0001</b>                     |
| Eicosenoic, C20:1                            | 0.27(0.11)            | 0.28 (0.11)                 | 0.23 (0.04)           | <b>&lt;0.0001</b>                     |
| Nervonic, C24:1                              | 0.45(0.15)            | 0.45 (0.15)                 | 0.46 (0.14)           | 0.17                                  |
| <i>trans</i> Oleic, C18:1 <i>trans</i>       | 1.62(0.55)            | 1.65 (0.55)                 | 1.27 (0.41)           | <b>&lt;0.0001</b>                     |
| <i>trans</i> Linoleic, C18:2 <i>trans</i>    | 0.25(0.08)            | 0.25 (0.08)                 | 0.19 (0.05)           | <b>&lt;0.0001</b>                     |
| <i>trans</i> Palmitoleic, C16:1 <i>trans</i> | 0.17(0.05)            | 0.17 (0.05)                 | 0.15 (0.04)           | <b>&lt;0.0001</b>                     |
| Linoleic, C18:2n6                            | 11.19(1.74)           | 11.13 (1.71)                | 11.78 (1.92)          | <b>&lt;0.0001</b>                     |
| gamma-Linolenic, C18:3n6                     | 0.08(0.09)            | 0.08 (0.10)                 | 0.08 (0.04)           | 0.34                                  |
| Eicosadienoic, C20:2n6                       | 0.28(0.05)            | 0.28 (0.05)                 | 0.31 (0.06)           | <b>&lt;0.0001</b>                     |
| Eicosatrienoic, C20:3n6                      | 1.59(0.36)            | 1.60 (0.36)                 | 1.52 (0.30)           | <b>0.0002</b>                         |
| Arachidonic, C20:4n6                         | 16.78(1.62)           | 16.79 (1.60)                | 16.62 (1.78)          | 0.088                                 |
| Docosatetraenoic, C22:4n6                    | 3.76(0.83)            | 3.79 (0.82)                 | 3.48 (0.86)           | <b>&lt;0.0001</b>                     |
| Docosapentaenoic, C22:5n6                    | 0.66(0.19)            | 0.66 (0.19)                 | 0.61 (0.19)           | <b>&lt;0.0001</b>                     |
| alpha-Linolenic, C18:3n3                     | 0.19(0.10)            | 0.18 (0.11)                 | 0.20 (0.08)           | 0.013                                 |
| Eicosapentaenoic (EPA), C20:5n3              | 0.74(0.46)            | 0.73 (0.46)                 | 0.80 (0.47)           | 0.013                                 |
| Docosapentaenoic, C22:5n3                    | 2.74(0.46)            | 2.75 (0.46)                 | 2.71 (0.46)           | 0.13                                  |
| Docosahexaenoic (DHA), C22:6n3               | 4.88(1.38)            | 4.83 (1.36)                 | 5.36 (1.49)           | <b>&lt;0.0001</b>                     |
| Omega-3 Index (EPA+DHA) <sup>b</sup>         | 5.62(1.71)            | 5.56 (1.69)                 | 6.16 (1.83)           | <b>&lt;0.0001</b>                     |

<sup>a</sup> For testing differences between the two cohorts the critical level alpha was set to 0.05 / 23 fatty acids = 0.0022 for statistical significance using Bonferroni correction (shown in **bold**); <sup>b</sup> The omega-3 index of those participants who did not report fish oil supplementation was 5.34 (1.54)% in the Offspring cohort (n=2591) and 6.10 (1.82)% in the Omni cohort (n=283) (P>0.0001).

**Supplementary Table 3. Clinical correlates for individual n-3 fatty acids (N=2964)**

| Variables                                   | EPA                   |        |       |                      | DHA                   |        |       |                      |
|---------------------------------------------|-----------------------|--------|-------|----------------------|-----------------------|--------|-------|----------------------|
|                                             | Exp(Est) <sup>a</sup> | 95% CI |       | P-value <sup>b</sup> | Exp(Est) <sup>a</sup> | 95% CI |       | P-value <sup>b</sup> |
|                                             |                       | Lower  | Upper |                      |                       | Lower  | Upper |                      |
| Age (10 years) <sup>c</sup>                 | 1.03                  | 1.01   | 1.05  | <b>0.0008</b>        | 1.05                  | 1.04   | 1.06  | <b>&lt;0.0001</b>    |
| Sex (Female) <sup>c</sup>                   | 1.03                  | 0.99   | 1.06  | 0.11                 | 1.06                  | 1.04   | 1.08  | <b>&lt;0.0001</b>    |
| White <sup>c</sup>                          | 0.89                  | 0.83   | 0.94  | <b>0.0001</b>        | 0.89                  | 0.85   | 0.92  | <b>&lt;0.0001</b>    |
| Highest Education <sup>c</sup> :            |                       |        |       |                      |                       |        |       |                      |
| Graduate or Professional                    | 1.20                  | 1.14   | 1.25  | <b>&lt;0.0001</b>    | 1.10                  | 1.08   | 1.14  | <b>&lt;0.0001</b>    |
| Associate/Bachelor                          | 1.13                  | 1.09   | 1.17  | <b>&lt;0.0001</b>    | 1.09                  | 1.06   | 1.11  | <b>&lt;0.0001</b>    |
| Grade 12 (Reference)                        | 1.00                  | -      | -     | -                    | 1.00                  | -      | -     | -                    |
| Grades <12                                  | 0.92                  | 0.86   | 0.99  | 0.026                | 0.93                  | 0.88   | 0.97  | 0.0018               |
| Fish Oil Supplementation                    | 1.80                  | 1.71   | 1.89  | <b>&lt;0.0001</b>    | 1.29                  | 1.25   | 1.32  | <b>&lt;0.0001</b>    |
| HDL Cholesterol<br>(1 SD = 18 mg/100ml)     | 1.07                  | 1.05   | 1.09  | <b>&lt;0.0001</b>    | 0.97                  | 0.96   | 0.98  | <b>&lt;0.0001</b>    |
| LDL Cholesterol<br>(1 SD = 32 mg/100ml)     | 1.06                  | 1.04   | 1.07  | <b>&lt;0.0001</b>    | 1.02                  | 1.00   | 1.03  | 0.0073               |
| Lipid Pharmacotherapy                       | 1.11                  | 1.07   | 1.15  | <b>&lt;0.0001</b>    | 1.06                  | 1.03   | 1.08  | <b>&lt;0.0001</b>    |
| 1-2 Drinks / Day <sup>d</sup>               | 1.11                  | 1.07   | 1.16  | <b>&lt;0.0001</b>    |                       | e      |       |                      |
| Heart Rate<br>(1 SD = 10 bpm)               | 0.97                  | 0.96   | 0.99  | <b>0.0001</b>        | 0.98                  | 0.97   | 0.99  | <b>&lt;0.0001</b>    |
| Waist Girth at Umbilicus<br>(1 SD = 5.8 in) | 0.97                  | 0.96   | 0.99  | <b>0.0003</b>        | 0.98                  | 0.97   | 0.99  | <b>0.0001</b>        |
| Aspirin (3+ / week)                         | 1.05                  | 1.01   | 1.08  | 0.0040               | 1.04                  | 1.01   | 1.06  | <b>0.0008</b>        |
| Current Smoker                              |                       |        | e     |                      | 0.89                  | 0.86   | 0.92  | <b>&lt;0.0001</b>    |
| Ln[Triglycerides] (1 SD)                    |                       |        | e     |                      | 0.97                  | 0.95   | 0.98  | <b>&lt;0.0001</b>    |

<sup>a</sup> Represents the proportional change in fatty acid per 1 SD (continuous) or presence vs. absence (categorical) covariate; e.g. a 1 SD increase in Heart Rate is associated with 3% lower levels of EPA; <sup>b</sup> The critical level alpha was set to 0.05/25 clinical factors = 0.002 for statistical significance using Bonferroni correction (shown in **bold**); <sup>c</sup> Forced into model; <sup>d</sup> Indicator variable for females > 7 drinks/week, males > 14 drinks/week. <sup>e</sup> Variable was not selected into the model.

**Supplementary Table 4. Clinical correlates for individual n-3 fatty acids (N=2964)**

| Variables                                   | DPA                   |        |       |                      | ALA                   |        |       |                      |
|---------------------------------------------|-----------------------|--------|-------|----------------------|-----------------------|--------|-------|----------------------|
|                                             | Exp(Est) <sup>a</sup> | 95% CI |       | P-value <sup>b</sup> | Exp(Est) <sup>a</sup> | 95% CI |       | P-value <sup>b</sup> |
|                                             |                       | Lower  | Upper |                      |                       | Lower  | Upper |                      |
| Age (10 years) <sup>c</sup>                 | 1.00                  | 1.00   | 1.01  | 0.53                 | 1.02                  | 1.00   | 1.04  | 0.050                |
| Sex (Female) <sup>c</sup>                   | 0.96                  | 0.95   | 0.97  | <b>&lt;0.0001</b>    | 1.08                  | 1.05   | 1.12  | <b>&lt;0.0001</b>    |
| White <sup>c</sup>                          | 1.01                  | 0.99   | 1.03  | 0.41                 | 0.89                  | 0.86   | 0.93  | <b>&lt;0.0001</b>    |
| Highest Education <sup>c</sup> :            |                       |        |       |                      |                       |        |       |                      |
| Graduate or Professional                    | 1.02                  | 1.01   | 1.04  | <b>0.0025</b>        | 1.01                  | 0.98   | 1.05  | 0.47                 |
| Associate/Bachelor                          | 1.00                  | 0.99   | 1.02  | 0.58                 | 1.04                  | 1.01   | 1.08  | 0.022                |
| Grade 12 (Reference)                        | 1.00                  | -      | -     | -                    | 1.00                  | -      | -     | -                    |
| Grades <12                                  | 0.98                  | 0.95   | 1.01  | 0.18                 | 1.02                  | 0.95   | 1.09  | 0.62                 |
| Fish Oil Supplementation                    | 1.17                  | 1.15   | 1.19  | <b>&lt;0.0001</b>    |                       | e      |       |                      |
| HDL Cholesterol<br>(1 SD = 18 mg/100ml)     | 1.01                  | 1.00   | 1.02  | <b>0.0036</b>        | 1.05                  | 1.03   | 1.07  | <b>&lt;0.0001</b>    |
| LDL Cholesterol<br>(1 SD = 32 mg/100ml)     |                       |        | e     |                      |                       |        | e     |                      |
| Lipid Pharmacotherapy                       |                       |        | e     |                      | 0.93                  | 0.90   | 0.96  | <b>&lt;0.0001</b>    |
| 1-2 Drinks / Day <sup>d</sup>               |                       |        | e     |                      |                       |        | e     |                      |
| Heart Rate<br>(1 SD = 10 bpm)               |                       |        | e     |                      |                       |        | e     |                      |
| Waist Girth at Umbilicus<br>(1 SD = 5.8 in) | 0.99                  | 0.98   | 1.00  | <b>0.0004</b>        | 0.97                  | 0.96   | 0.99  | <b>0.0002</b>        |
| Aspirin (3+ / week)                         |                       |        | e     |                      |                       |        | e     |                      |
| Current Smoker                              | 0.97                  | 0.95   | 0.99  | <b>0.0012</b>        |                       |        | e     |                      |
| Ln[Triglycerides] (1 SD)                    |                       |        | e     |                      | 1.05                  | 1.03   | 1.07  | <b>&lt;0.0001</b>    |

<sup>a</sup> Represents the proportional change in fatty acid per 1 SD (continuous) or presence vs. absence (categorical) covariate; e.g. a 1 SD increase in HDL-C is associated with 5% higher levels of ALA; <sup>b</sup> The critical level alpha was set to 0.05 / 25 clinical factors = 0.002 for statistical significance using Bonferroni correction (shown in **bold**); <sup>c</sup> Forced into model; <sup>d</sup> Indicator variable for females > 7 drinks/week, males > 14 drinks/week. <sup>e</sup> Variable was not selected into the model.

**Supplementary Table 5. Mediating Effects of Dietary EPA+DHA on RBC EPA+DHA in Offspring Cohort**

| Variable (N=2182)                           | Without Dietary Intake<br>(1 Replicate) |              |                  | With Dietary Intake<br>(1 Replicate) |              |                  | Bootstrapping 99.64% CI<br>(1000 Replicates) |              |              |
|---------------------------------------------|-----------------------------------------|--------------|------------------|--------------------------------------|--------------|------------------|----------------------------------------------|--------------|--------------|
|                                             | Est. <sup>a</sup>                       | SE           | P-value          | Est. <sup>a</sup>                    | SE           | P-value          | Diff. Est.                                   | Lower        | Upper        |
| Age (10 years) <sup>b</sup>                 | 0.042                                   | 0.007        | <.0001           | 0.034                                | 0.006        | <.0001           | 0.009                                        | -0.003       | 0.022        |
| Sex (Female) <sup>b</sup>                   | 0.049                                   | 0.013        | 0.0003           | 0.053                                | 0.011        | <.0001           | -0.006                                       | -0.038       | 0.026        |
| <b>Highest Education<sup>b</sup>:</b>       |                                         |              |                  |                                      |              |                  |                                              |              |              |
| <b>Graduate or Professional</b>             | <b>0.109</b>                            | <b>0.016</b> | <b>&lt;.0001</b> | <b>0.057</b>                         | <b>0.014</b> | <b>&lt;.0001</b> | <b>0.040</b>                                 | <b>0.011</b> | <b>0.069</b> |
| <b>Associate/Bachelor</b>                   | <b>0.084</b>                            | <b>0.013</b> | <b>&lt;.0001</b> | <b>0.052</b>                         | <b>0.011</b> | <b>&lt;.0001</b> | <b>0.027</b>                                 | <b>0.000</b> | <b>0.056</b> |
| Grade 12 (Reference)                        | 0.000                                   | -            | -                | 0.000                                | -            | -                |                                              | n/a          |              |
| Grades <12                                  | -0.081                                  | 0.033        | 0.0148           | -0.026                               | 0.032        | 0.41             | -0.054                                       | -0.113       | 0.026        |
| <b>Fish Oil Supplementation</b>             | <b>0.311</b>                            | <b>0.016</b> | <b>&lt;.0001</b> | <b>0.178</b>                         | <b>0.018</b> | <b>&lt;.0001</b> | <b>0.126</b>                                 | <b>0.091</b> | <b>0.160</b> |
| HDL Cholesterol<br>(1 SD = 18 mg/dL)        | -0.013                                  | 0.008        | 0.0922           | -0.016                               | 0.006        | 0.016            | 0.003                                        | -0.013       | 0.019        |
| LDL Cholesterol<br>(1 SD = 32 mg/dL)        | 0.013                                   | 0.007        | 0.0505           | 0.004                                | 0.006        | 0.50             | 0.008                                        | -0.005       | 0.020        |
| Lipid Pharmacotherapy                       | 0.060                                   | 0.014        | <.0001           | 0.046                                | 0.011        | <.0001           | 0.009                                        | -0.017       | 0.034        |
| Heart Rate (1 SD = 10 bpm)                  | -0.020                                  | 0.005        | 0.0003           | -0.012                               | 0.005        | 0.0072           | -0.006                                       | -0.016       | 0.006        |
| Waist Girth at Umbilicus<br>(1 SD = 5.8 in) | -0.024                                  | 0.006        | 0.0002           | -0.021                               | 0.005        | <.0001           | -0.005                                       | -0.020       | 0.012        |
| Aspirin (3+ / week)                         | 0.036                                   | 0.012        | 0.0024           | 0.027                                | 0.010        | 0.0070           | 0.011                                        | -0.014       | 0.033        |
| Current Smoker                              | -0.126                                  | 0.021        | <.0001           | -0.116                               | 0.019        | <.0001           | -0.017                                       | -0.060       | 0.020        |
| Ln[Triglycerides] (1 SD)                    | -0.023                                  | 0.007        | 0.0006           | -0.014                               | 0.006        | 0.021            | -0.006                                       | -0.018       | 0.009        |
| Ln[Dietary Intake] (1 SD)                   |                                         | n/a          |                  | 0.149                                | 0.006        | <.0001           |                                              | n/a          |              |

Significant *mediation effects* are shown in **bold**; Maximum Likelihood (not REML) was used to compare these fixed effects;

<sup>a</sup> Represents the change in log fatty acid per 1 SD (continuous) or presence vs. absence (categorical) covariate; <sup>b</sup> Forced into model.
